# Supplementary material for: Tumor suppressor miR-613 induces cisplatin sensitivity in non-small cell lung cancer cells by targeting GJA1
Source: PubMed Central journal article supplement — Mol Med Rep. 2021 Mar 18;23(5):385. doi: 10.3892/mmr.2021.12024 (PMC7986010; doi:10.3892/mmr.2021.12024), 2021-03-18

Figure S1. Expression levels of predicted downstream genes of miR-613. (A) GJA1, (B) HACD3, (C) PAX7, (D) PHAX, (E) BDNF, (F) G6PD, (G) CPED1, (H) TNKS2 and (I) SLC44A1 in normal and tumor tissues. Data are presented as the mean  $\pm$  SEM. \* $P < 0.05$ . NS, not significant; GJA1, gap junction  $\alpha$ -1 protein.

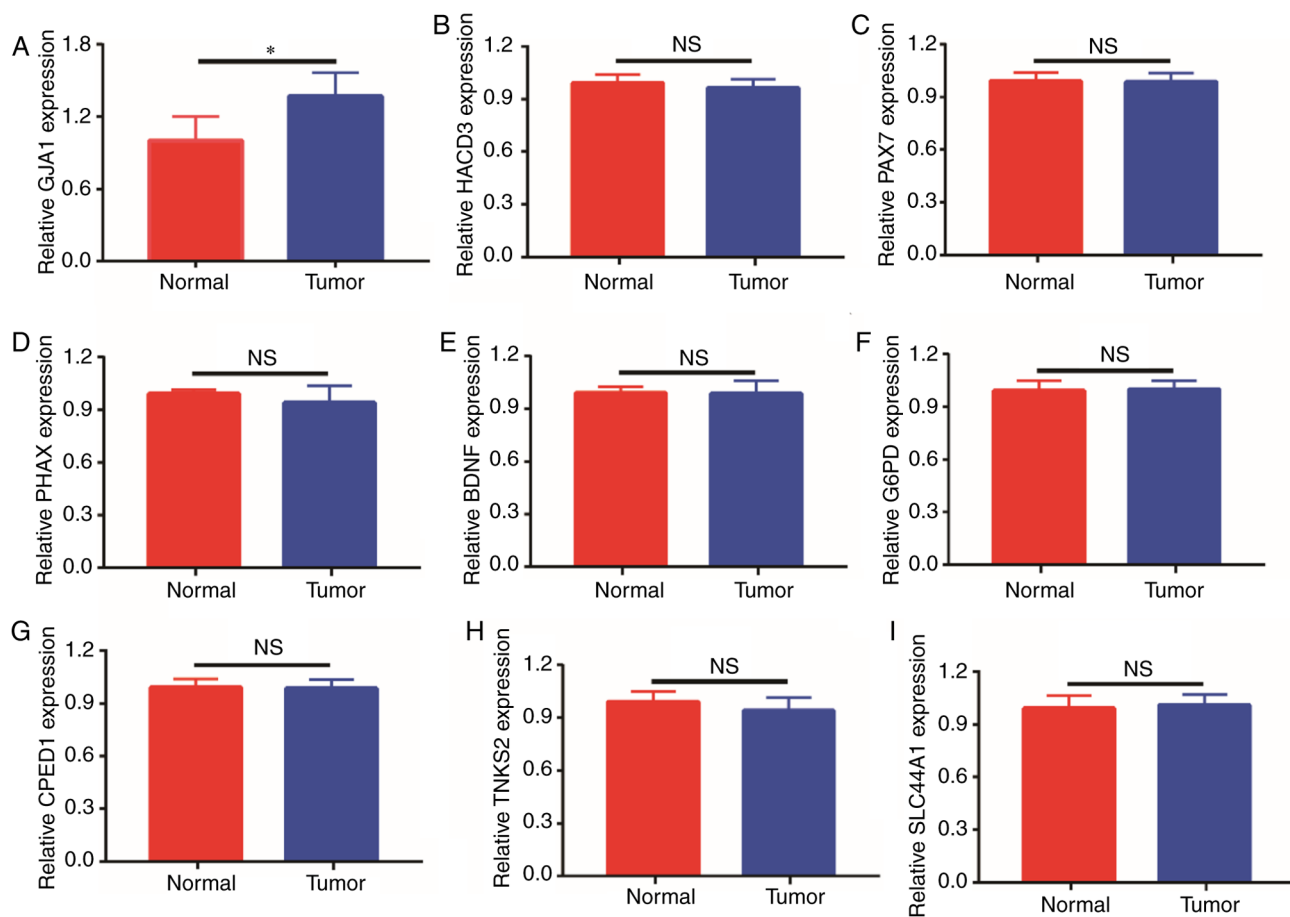

Supplement: Supplementary_Data.pdf [file Supplementary_Data.pdf]
